# Supplementary material
Source: PubMed Central journal article supplement (PMC3736739)
Supplement: mmc1.pdf [file mmc1.pdf]

## **Supporting Material**

### **NMR-Based Simulation Studies of Pf1 Coat Protein in Explicit Membranes**

Xi Cheng<sup>1</sup>, Sunhwan Jo<sup>1</sup>, Francesca M. Marassi<sup>2</sup>, and Wonpil Im<sup>1</sup>

<sup>1</sup>Department of Molecular Biosciences and Center for Bioinformatics, The University of Kansas, 2030 Becker Drive, Lawrence, KS 66047, USA.

<sup>2</sup>Sanford-Burnham Medical Research Institute, 10901 North Torrey Pines Road, La Jolla, CA 92037, USA.

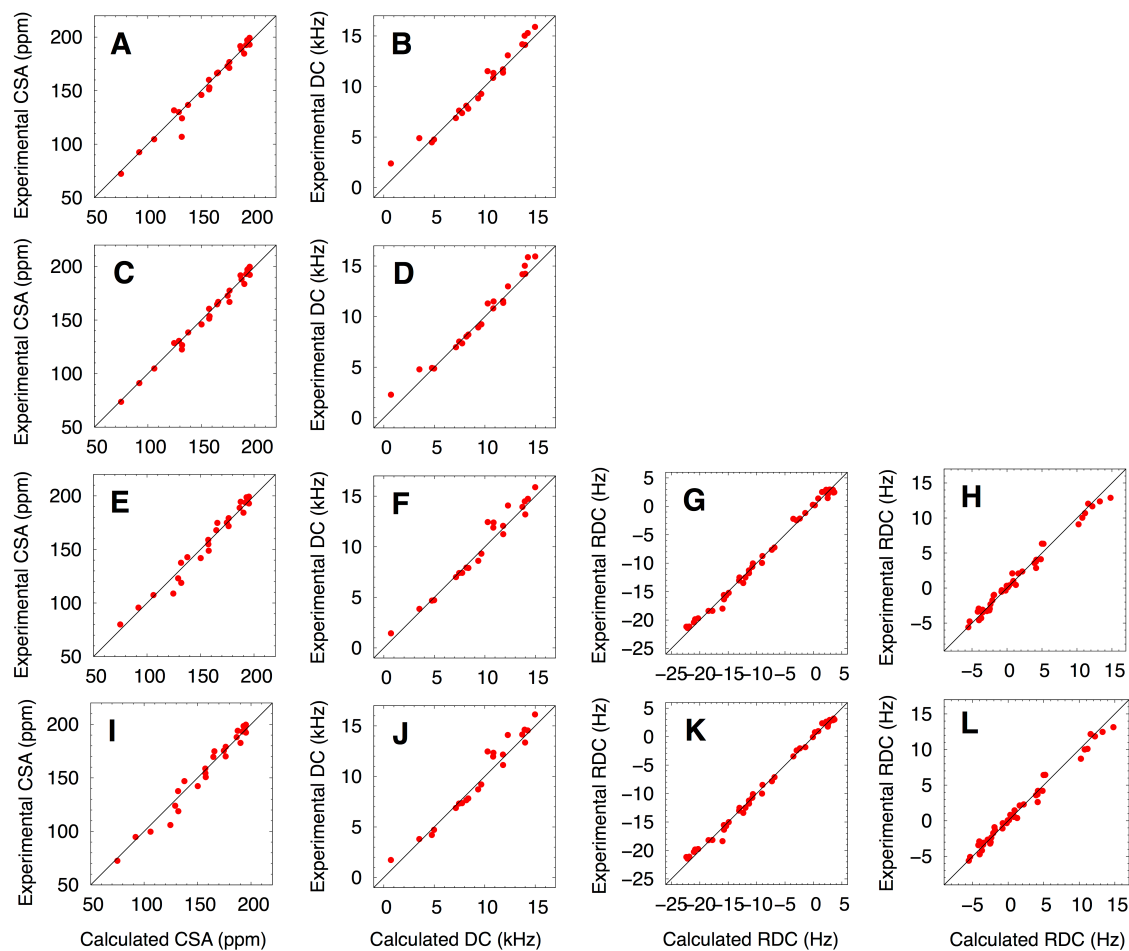

**FIGURE S1.** Correlation between experimental and back-calculated CSA, DC, and RDC set 1 and 2 for Pf1 coat protein in (A, B) S1/M1, (C, D) S1/M2, (E, F, G, H) S2/M1 and (I, J, K, L) S2/M2.
